# Supplementary material for: Insulin Resistance and the Risk of Diabetes and Dysglycemia in Korean General Adult Population
Source: PubMed Central journal article supplement — Diabetes Metab J. 2018 Apr 24;42(4):296–307. doi: 10.4093/dmj.2017.0106 (PMC6107354; doi:10.4093/dmj.2017.0106), 2018-04-24
Supplement: dmj-42-296-s001.pdf [file dmj-42-296-s001.pdf]

**Supplementary Table 1.** Baseline clinical and demographic characteristics according to diabetes criteria

| Characteristic            | Men               |                  |                  | Women   |                   |                   |                  |         |
|---------------------------|-------------------|------------------|------------------|---------|-------------------|-------------------|------------------|---------|
|                           | NGT               | Prediabetes      | T2DM             | P value | NGT               | Prediabetes       | T2DM             | P value |
| Number                    | 913 (49.3)        | 818 (44.2)       | 120 (6.5)        |         | 1,456 (59.7)      | 889 (36.4)        | 95 (3.9)         |         |
| Age, yr                   | 45.2±17.1         | 55.3±14.2        | 58.1±12.5        | <0.001  | 44.9±15.1         | 58.6±13.0         | 59.2±13.7        | <0.001  |
| BMI, kg/m <sup>2</sup>    | 23.8±3.1          | 24.9±3.3         | 25.3±3.6         | <0.001  | 22.5±3.2          | 24.7±3.4          | 26.7±4.1         | 0.003   |
| WC, cm                    | 83.9±8.4          | 88.1±8.6         | 90.3±9.6         | <0.001  | 76.5±8.5          | 83.4±9.0          | 89.0±10.4        | 0.119   |
| SBP, mm Hg                | 118±14            | 124±17           | 128±16           | <0.001  | 112±17            | 122±18            | 126±18           | 0.010   |
| DBP, mm Hg                | 77±9              | 78±10            | 80±11            | 0.001   | 73±10             | 75±10             | 76±10            | 0.510   |
| FPG, mg/dL                | 91±6              | 103±9            | 117±6            | <0.001  | 89±6              | 101±9             | 139±33           | <0.001  |
| HbA1c, %                  | 5.3±0.2           | 5.7±0.3          | 7.2±1.4          | <0.001  | 5.3±0.2           | 5.8±0.3           | 6.9±1.0          | <0.001  |
| Total cholesterol, mg/dL  | 185±33            | 194±36           | 200±40           | <0.001  | 191±33            | 199±36            | 203±41           | 0.004   |
| TG, mg/dL                 | 112 (76–166)      | 137 (97–203)     | 171 (119–289)    | <0.001  | 83 (59–120)       | 113 (83–164)      | 145 (112–205)    | <0.001  |
| HDL-C, mg/dL              | 49±11             | 47±12            | 44±10            | <0.001  | 57±13             | 51±12             | 46±11            | 0.003   |
| LDL-C, mg/dL              | 112±30            | 117±32           | 115±31           | 0.001   | 112±30            | 121±32            | 125±40           | <0.001  |
| Current smoker            | 260 (28.5)        | 228 (27.9)       | 36 (30.0)        | <0.001  | 39 (2.7)          | 30 (3.4)          | 4 (4.4)          | 0.458   |
| Heavy alcoholics          | 448 (59.4)        | 402 (59.5)       | 57 (57.6)        | 0.935   | 318 (31.0)        | 114 (22.9)        | 11 (21.6)        | 0.003   |
| Regular aerobic exercise  | 522 (58.8)        | 365 (46.1)       | 57 (49.1)        | <0.001  | 698 (48.8)        | 328 (37.7)        | 35 (37.2)        | <0.001  |
| Educational state, ≤HS    | 369 (41.5)        | 485 (61.0)       | 74 (63.2)        | <0.001  | 722 (50.3)        | 692 (79.8)        | 78 (83.0)        | <0.001  |
| Fasting insulin, µIU/mL   | 5.6 (3.8–8.4)     | 7.4 (4.9–10.7)   | 8.7 (5.3–13.7)   | <0.001  | 5.5 (3.9–7.9)     | 7.5 (5.3–11.1)    | 10.6 (6.8–18.3)  | <0.001  |
| HOMA-IR                   | 1.24 (0.85–1.89)  | 1.88 (1.24–2.76) | 3.13 (1.81–4.70) | <0.001  | 1.22 (0.84–1.76)  | 1.87 (1.26–2.80)  | 3.44 (2.07–6.14) | <0.001  |
| HOMA-β                    | 73.2 (51.0–108.0) | 66.7 (45.1–99.3) | 39.5 (21.8–68.6) | <0.001  | 78.1 (55.6–110.9) | 75.8 (52.3–105.2) | 56.8 (36.4–92.2) | <0.001  |
| <b>Metabolic syndrome</b> |                   |                  |                  |         |                   |                   |                  |         |
| Abdominal obesity         | 195 (21.4)        | 331 (40.5)       | 61 (50.8)        | <0.001  | 464 (31.9)        | 563 (63.3)        | 80 (84.2)        | <0.001  |
| TG                        | 263 (28.8)        | 359 (43.9)       | 67 (55.8)        | <0.001  | 203 (13.9)        | 267 (30.0)        | 46 (48.4)        | <0.001  |
| HDL-C                     | 211 (23.1)        | 232 (28.4)       | 39 (32.5)        | 0.011   | 452 (31.0)        | 460 (51.7)        | 65 (68.4)        | <0.001  |
| Blood pressure            | 338 (37.0)        | 453 (55.4)       | 77 (64.2)        | <0.001  | 337 (23.1)        | 446 (50.2)        | 61 (64.2)        | <0.001  |

Values are presented as number (%), mean ± standard deviation, or median (interquartile range).

NGT, normal glucose tolerance; T2DM, type 2 diabetes mellitus; BMI, body mass index; WC, waist circumference; SBP, systolic blood pressure; DBP, diastolic blood pressure; FPG, fasting plasma glucose; HbA1c, glycosylated hemoglobin; TG, triglyceride; HDL-C, high density lipoprotein cholesterol; LDL-C, low density lipoprotein cholesterol; HS, high school; HOMA-IR, homeostasis model assessment of insulin resistance; HOMA-β, homeostasis model assessment of β-cell function.
